# Supplementary material
Source: ML conference proceedings conference paper supplement (https://openreview.net/forum?id=LSzXkAWBKI)

## Training data

| $x_1$ | $x_2$ | $x_3$ | $x_4$ | $x_5$ | $x_6$ | $x_7$ | ... | $x_k$ |
|-------|-------|-------|-------|-------|-------|-------|-----|-------|
|       |       |       |       |       |       |       |     |       |
|       |       |       |       |       |       |       |     |       |
|       |       |       |       |       |       |       |     |       |

## Synthetic data

| $x'_1$ | $x'_2$ | $x'_3$ | $x'_4$ | $x'_5$ | $x'_6$ | $x'_7$ | ... | $x'_k$ |
|--------|--------|--------|--------|--------|--------|--------|-----|--------|
|        |        |        |        |        |        |        |     |        |
|        |        |        |        |        |        |        |     |        |
|        |        |        |        |        |        |        |     |        |

### Training partitions

| $x_2$ | $x_4$ | $x_6$ | $x_9$ |
|-------|-------|-------|-------|
|       |       |       |       |
|       |       |       |       |
|       |       |       |       |

| $x_3$ | $x_8$ |
|-------|-------|
|       |       |
|       |       |
|       |       |

...

| $x_5$ | $x_{11}$ | $x_{k-1}$ |
|-------|----------|-----------|
|       |          |           |
|       |          |           |
|       |          |           |

### Generative models

Parallel tracks

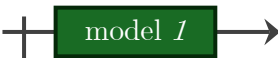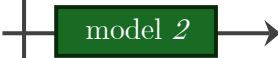

...

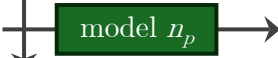

### Synthetic partitions

| $x'_2$ | $x'_4$ | $x'_6$ | $x'_9$ |
|--------|--------|--------|--------|
|        |        |        |        |
|        |        |        |        |
|        |        |        |        |

| $x'_3$ | $x'_8$ |
|--------|--------|
|        |        |
|        |        |
|        |        |

...

| $x'_5$ | $x'_{11}$ | $x'_{k-1}$ |
|--------|-----------|------------|
|        |           |            |
|        |           |            |
|        |           |            |

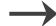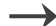

...

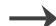

Joining operation

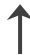

Supplement: supplementary_material [file figure1_framework_overview.pdf › disjoint-synthetic-data-generation-main/experiments/figures/figure1_framework_overview.pdf]
