# Supplementary material
Source: ML conference proceedings conference paper supplement (https://openreview.net/forum?id=LSzXkAWBKI)
Supplement: supplementary_material [file figure11_validator_pointplot.pdf › disjoint-synthetic-data-generation-main/experiments/figures/figure11_validator_pointplot.pdf]

PCA  $\Delta\lambda$  ↓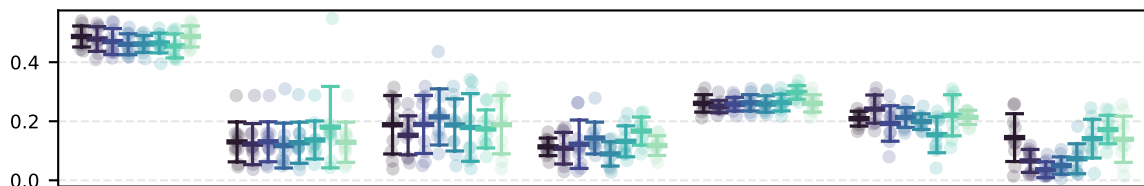

Hellinger distance ↓

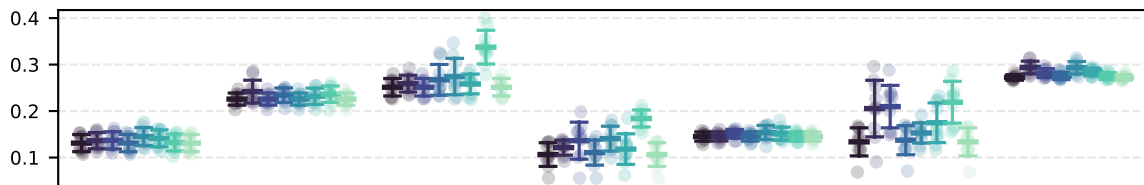

AUROC test diff. ↑

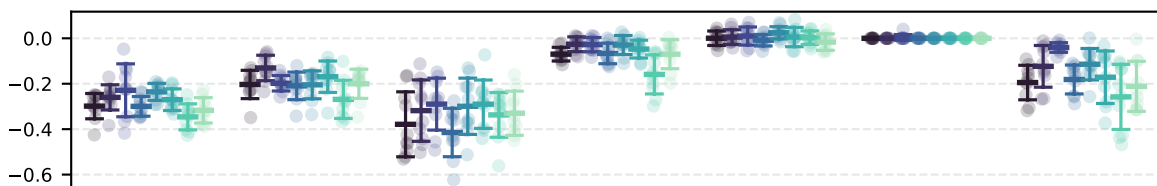

F1 test diff. ↑

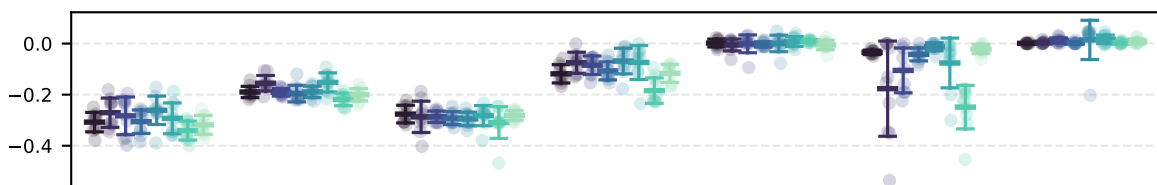 $\varepsilon$  ident. risk ↓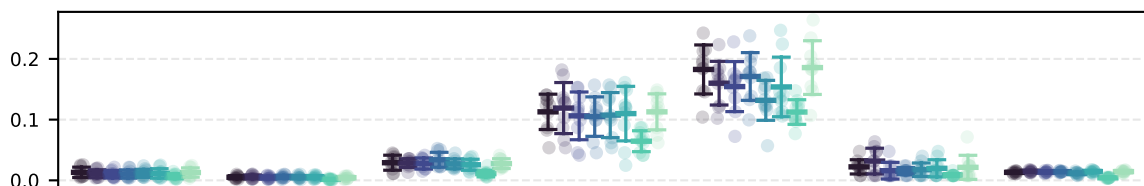

MIA recall ↓

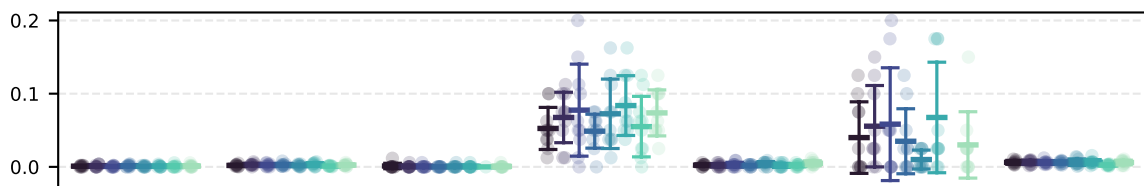

al bc cc hd hp kd st

concat rf lgbm knn svm mlp ocsvm out\_if
