# Supplementary material
Source: ML conference proceedings conference paper supplement (https://openreview.net/forum?id=LSzXkAWBKI)

— Gaussian noise    — Random replace    — Random shuffle

— 2 parts    - - - 3 parts    ····· 4 parts

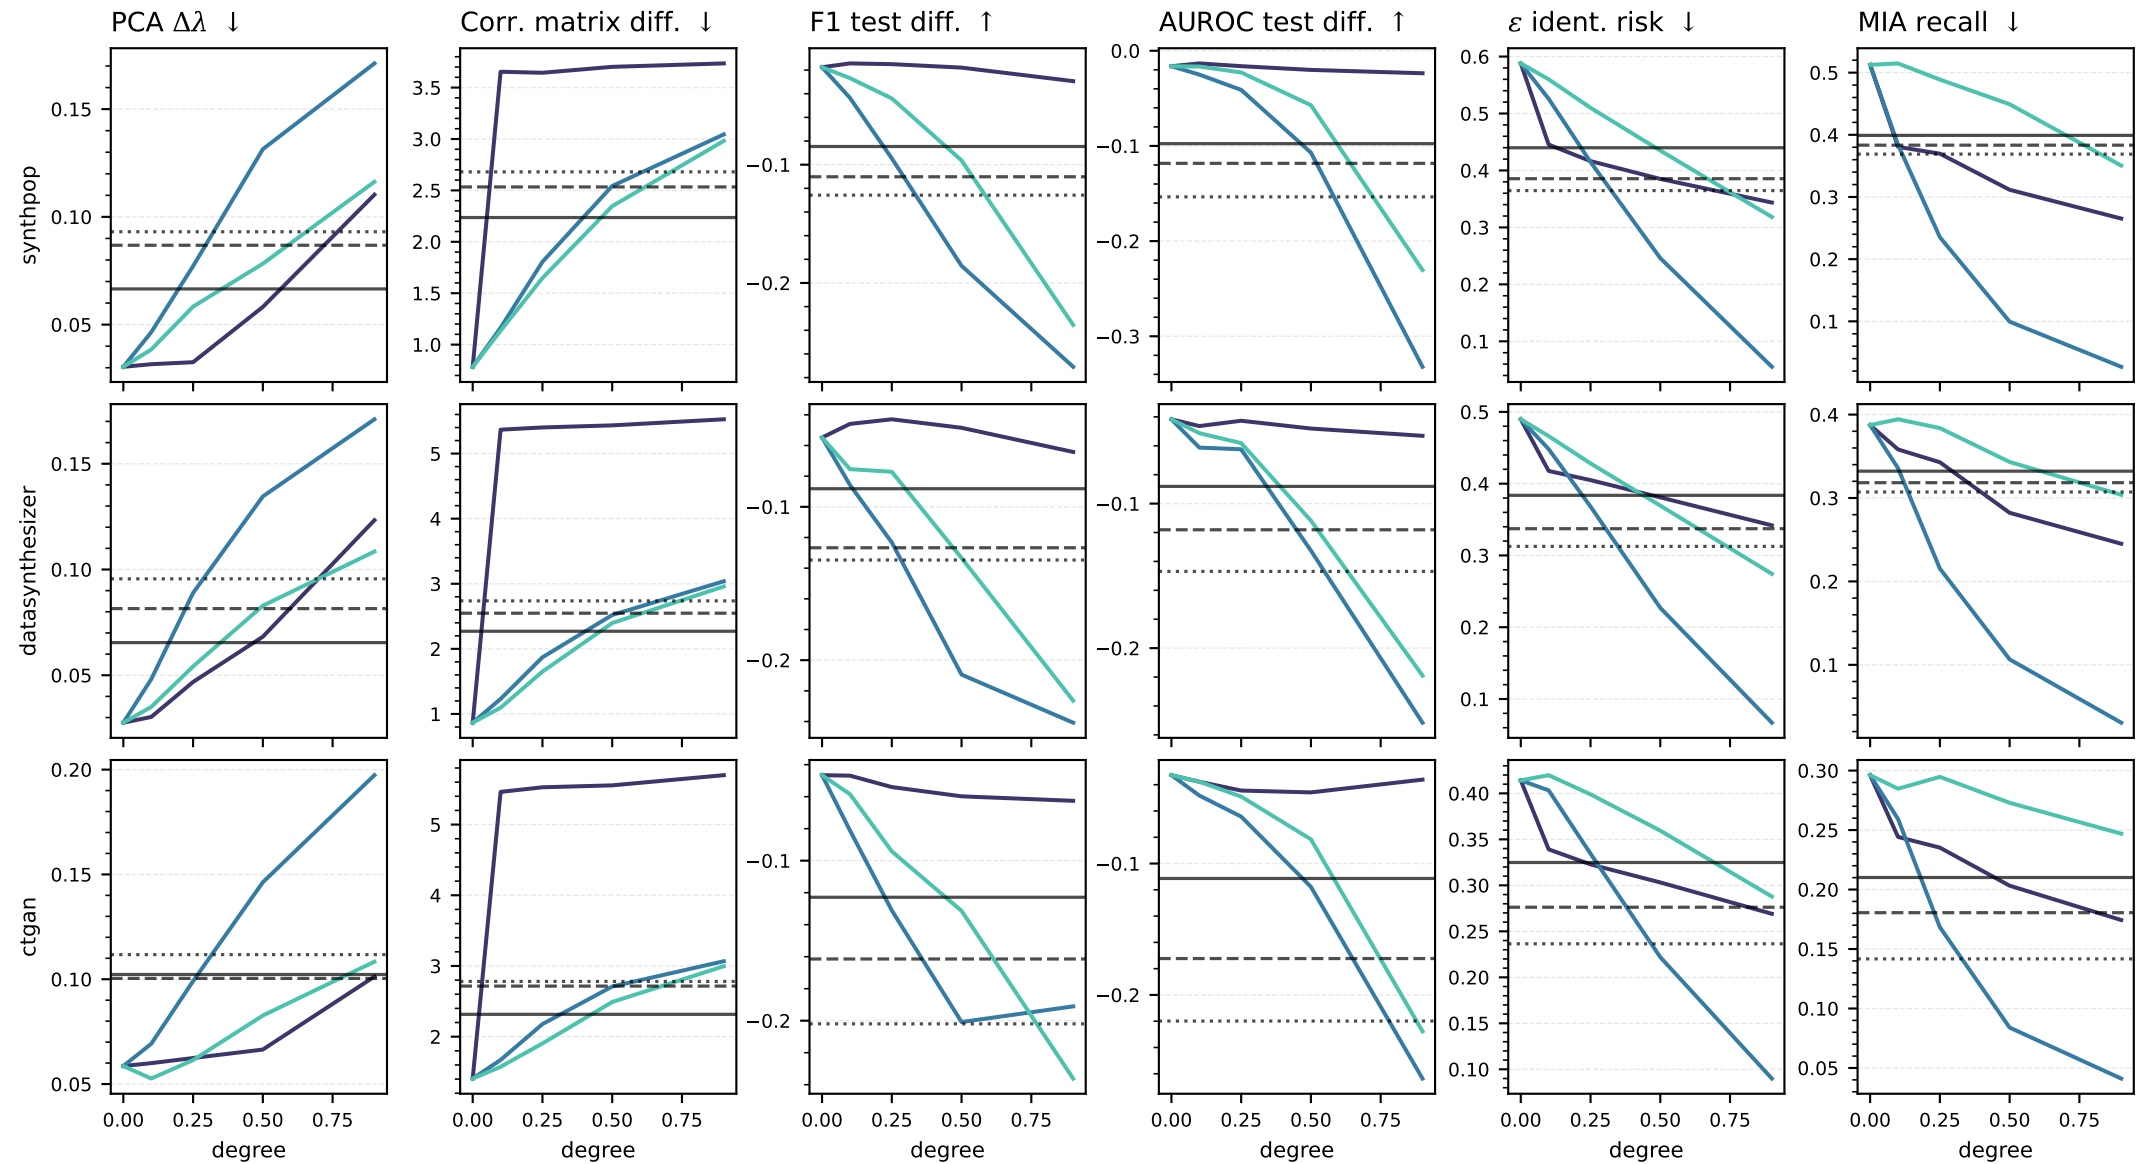

Supplement: supplementary_material [file figure10_metrics_vs_noise_aggregate.pdf › disjoint-synthetic-data-generation-main/experiments/figures/figure10_metrics_vs_noise_aggregate.pdf]

a) Plain scikit-learn RF model

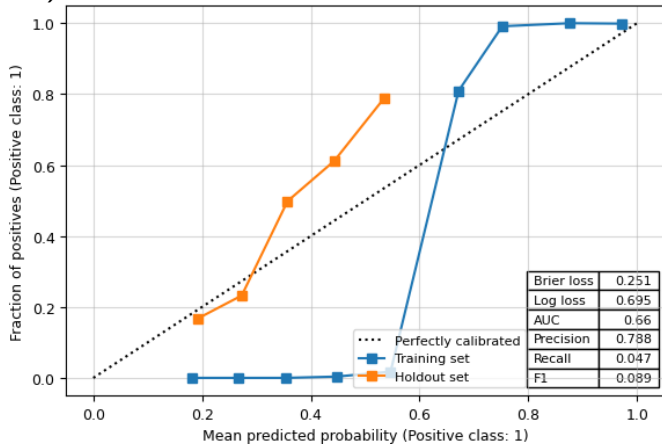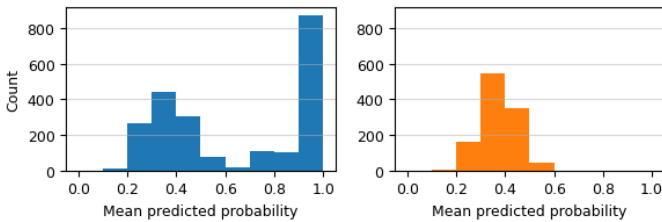

b) Optimised RF model

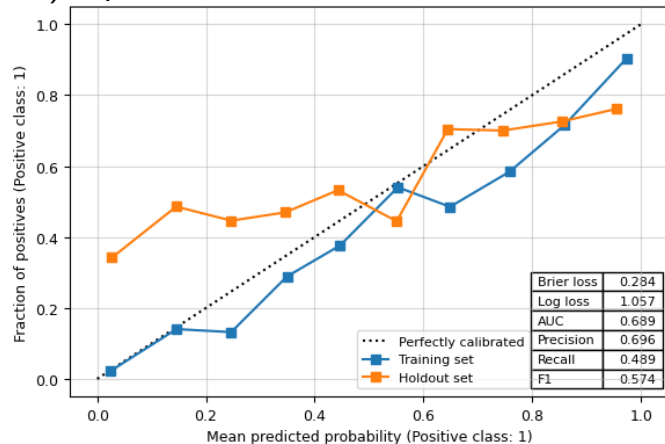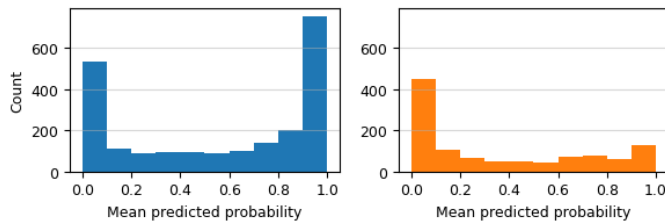

c) Sub-optimal RF model

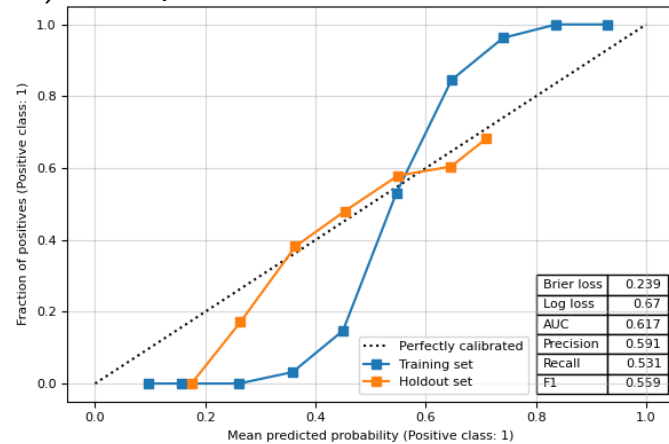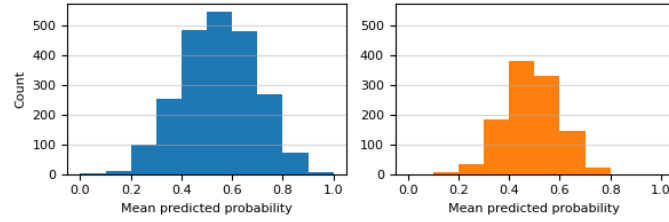

Supplement: supplementary_material [file figure12_calibration.pdf › disjoint-synthetic-data-generation-main/experiments/figures/figure12_calibration.pdf]

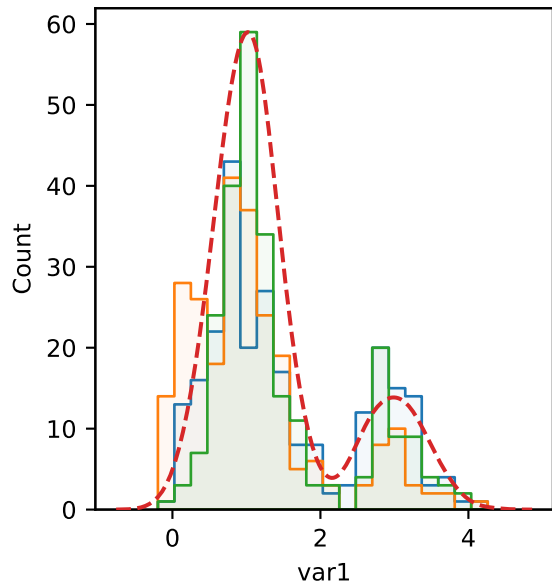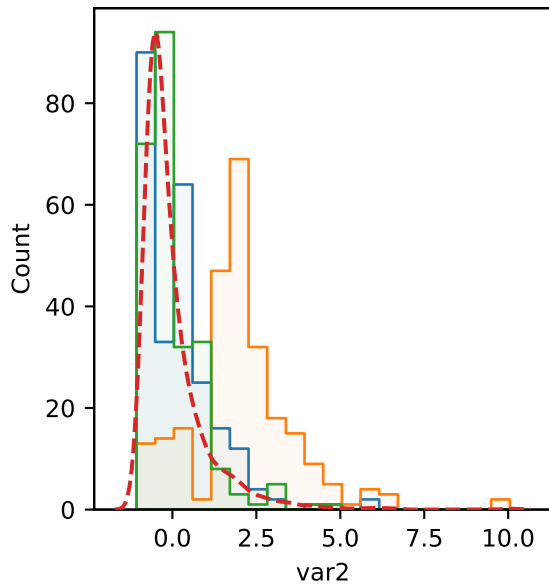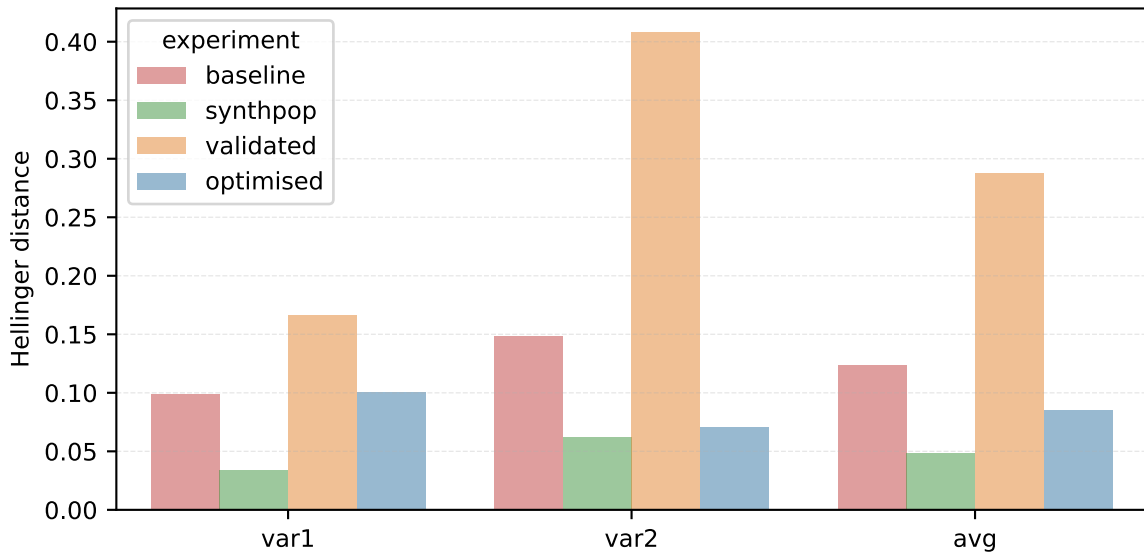

Supplement: supplementary_material [file figure13a_helling_breaks.pdf › disjoint-synthetic-data-generation-main/experiments/figures/figure13a_helling_breaks.pdf]

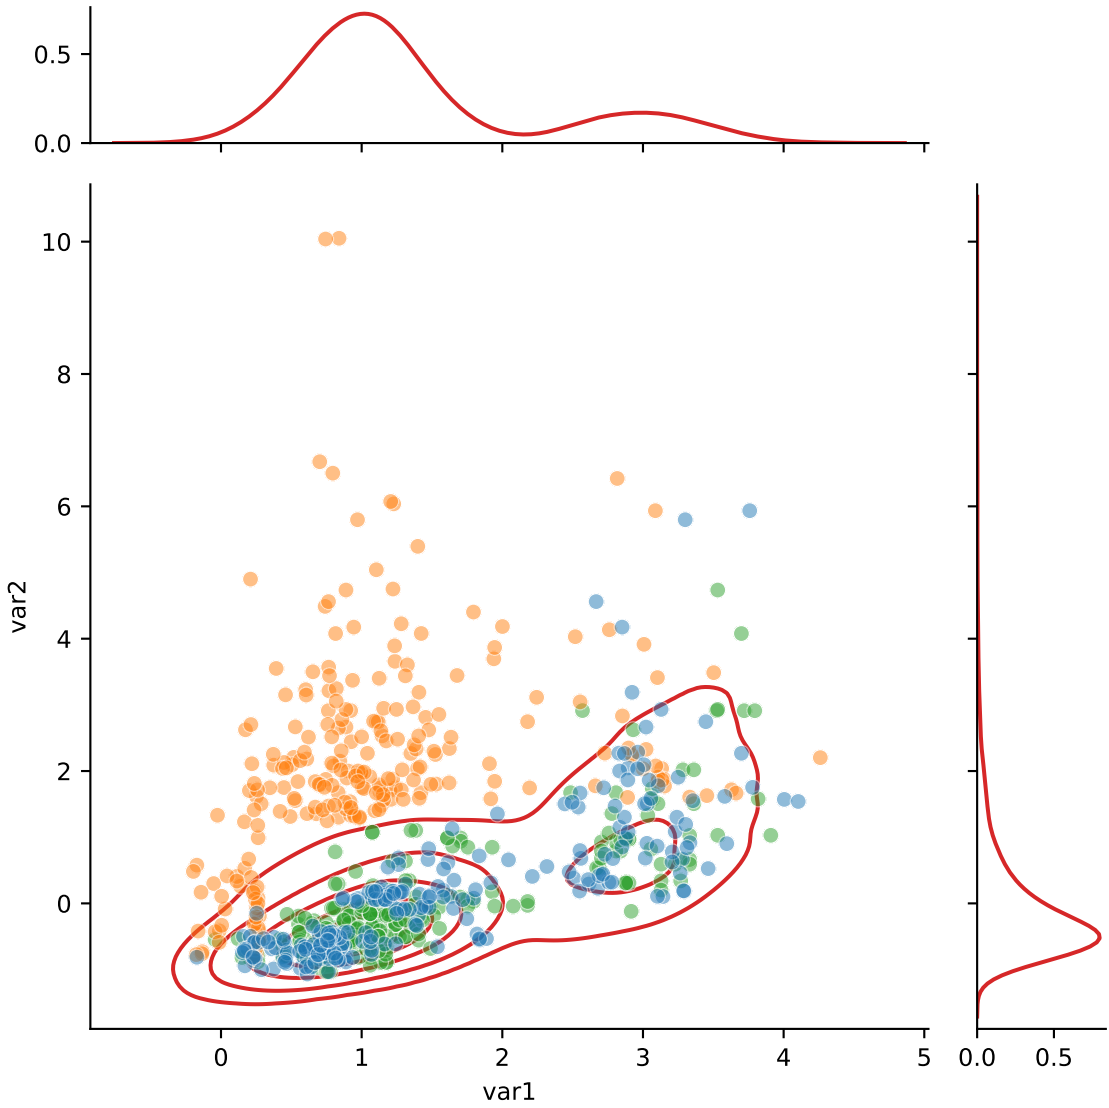

Supplement: supplementary_material [file figure13b_jointplot.pdf › disjoint-synthetic-data-generation-main/experiments/figures/figure13b_jointplot.pdf]

PCA  $\Delta\lambda$  ↓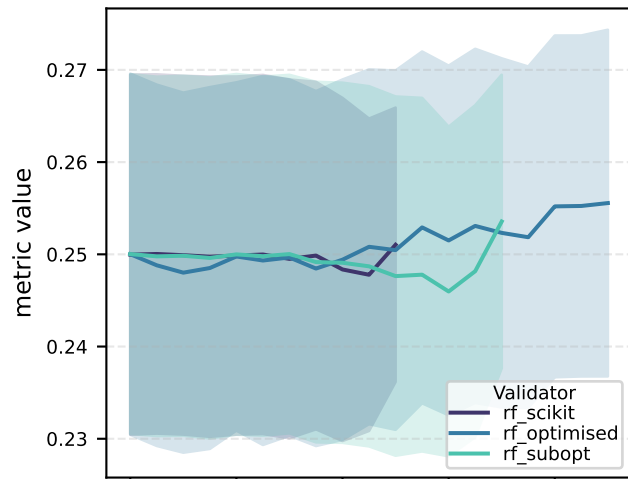PCA  $\Delta\theta$  ↓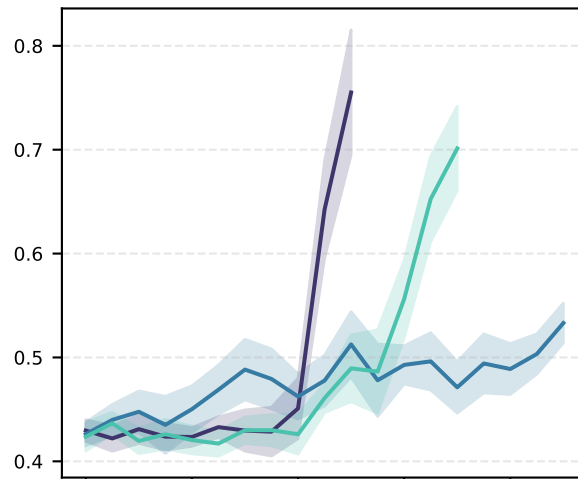

H-distance ↓

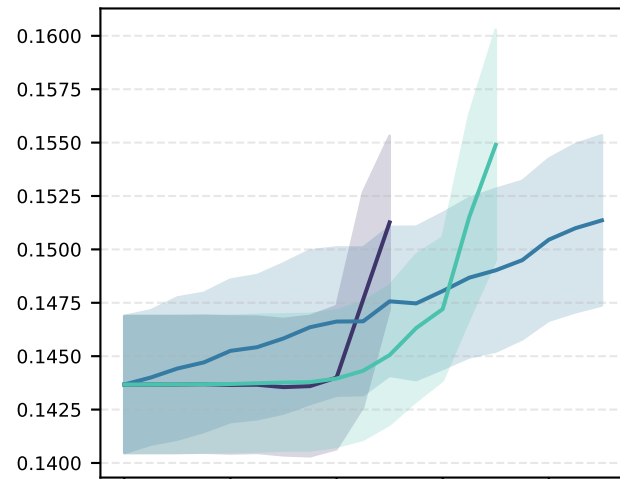

Corr. matrix diff. ↓

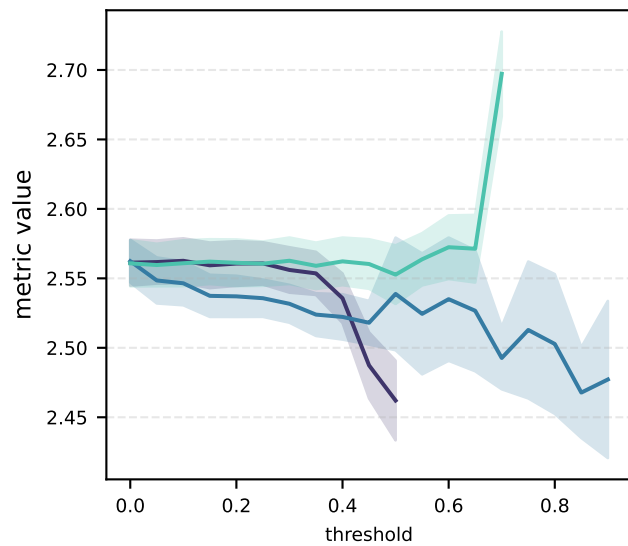 $\varepsilon$  ident. risk ↓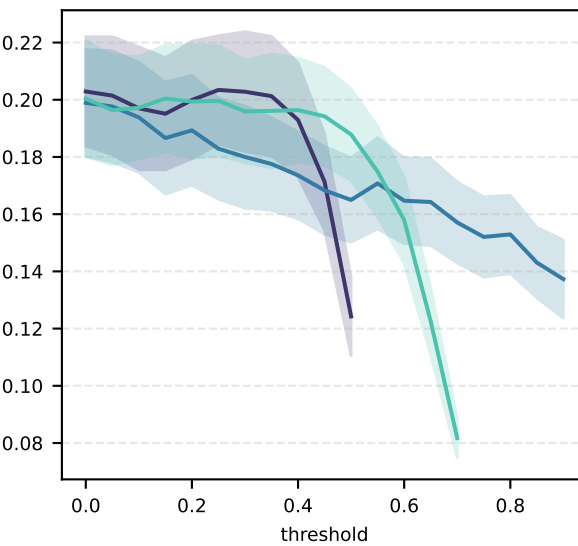

Median DCR ↓

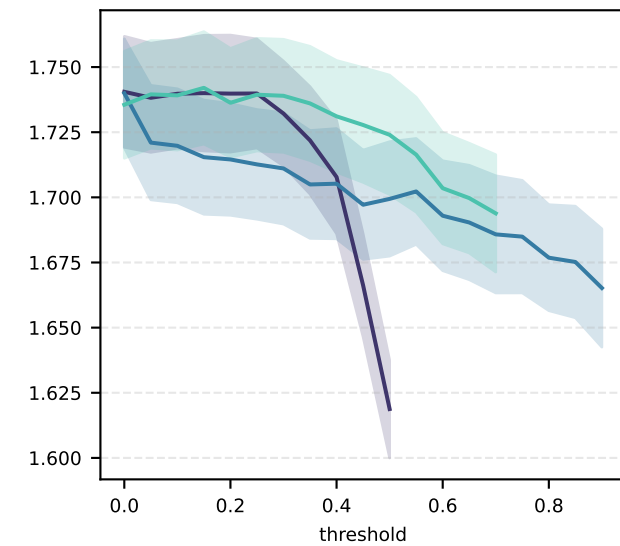

Supplement: supplementary_material [file figure14_threshold_continuum_plot.pdf › disjoint-synthetic-data-generation-main/experiments/figures/figure14_threshold_continuum_plot.pdf]

# Training data

Correct

|  |   |   |  |
|--|---|---|--|
|  | ⊗ | ⊗ |  |
|  |   |   |  |
|  |   |   |  |
|  |   |   |  |

Random

|  |   |   |  |
|--|---|---|--|
|  | ⊗ | ⊗ |  |
|  |   |   |  |
|  |   |   |  |
|  |   |   |  |

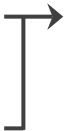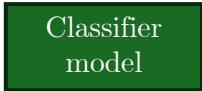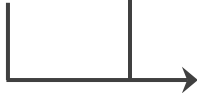

# Synthetic data

Random

|  |   |   |  |
|--|---|---|--|
|  | ⊗ | ⊗ |  |
|  |   |   |  |
|  |   |   |  |
|  |   |   |  |

# Prediction

Good -or- Bad

Supplement: supplementary_material [file figure2_validator_training.pdf › disjoint-synthetic-data-generation-main/experiments/figures/figure2_validator_training.pdf]

—●— al —●— bc —●— cc —●— hd —●— hp —●— kd —●— st

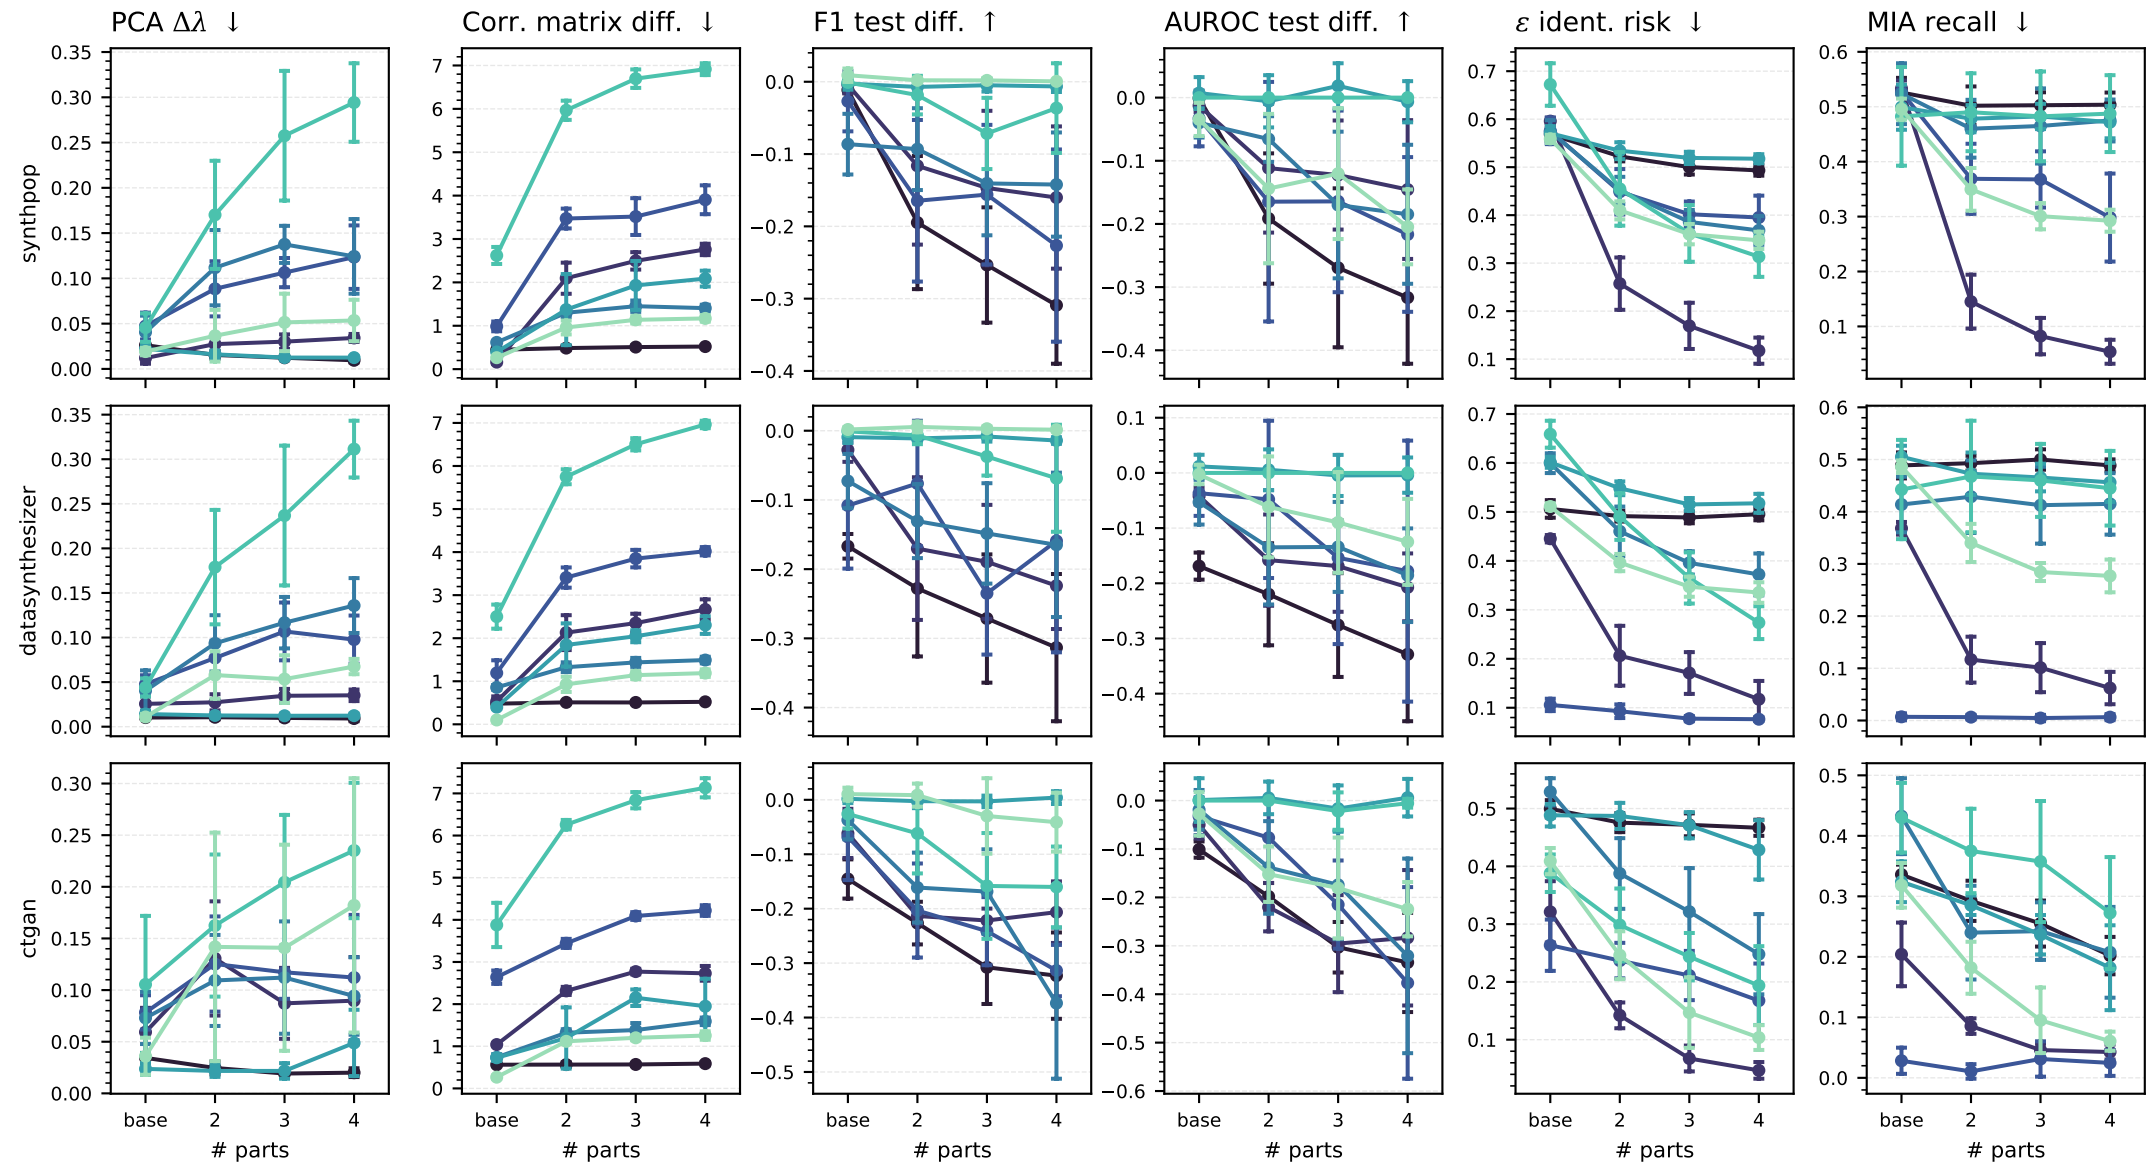

Supplement: supplementary_material [file figure3_metrics_vs_partitions.pdf › disjoint-synthetic-data-generation-main/experiments/figures/figure3_metrics_vs_partitions.pdf]

PCA  $\Delta\lambda$  ↓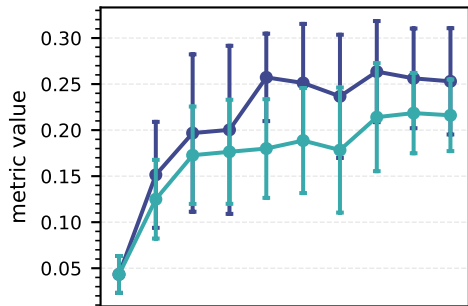

Corr. matrix diff. ↓

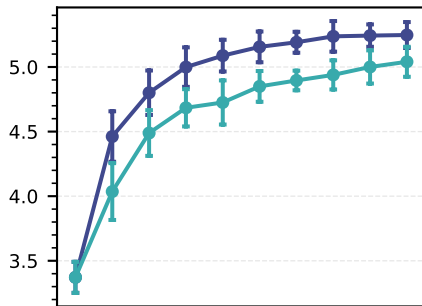

F1 test diff. ↑

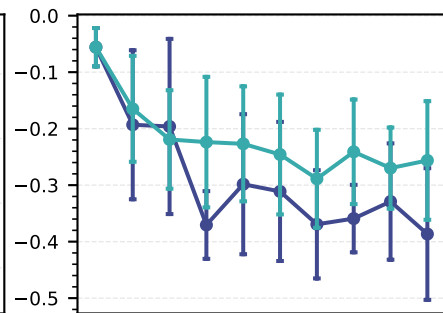

AUROC test diff. ↑

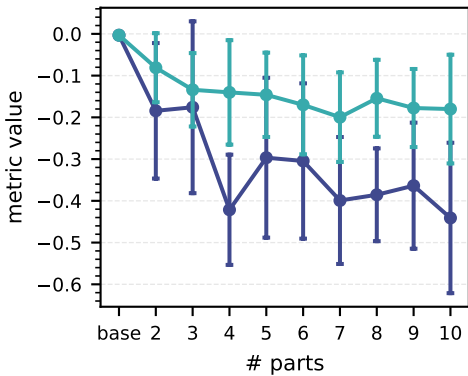 $\epsilon$  ident. risk ↓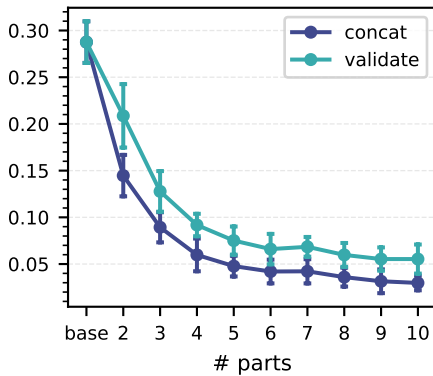

MIA recall ↓

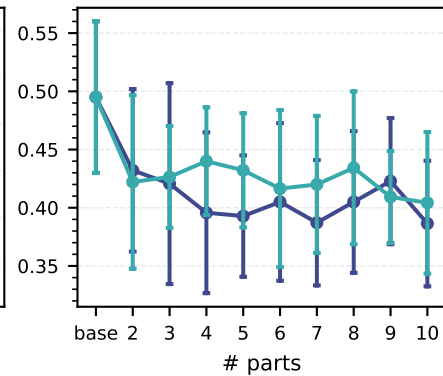

Supplement: supplementary_material [file figure4_concat_vs_validate.pdf › disjoint-synthetic-data-generation-main/experiments/figures/figure4_concat_vs_validate.pdf]

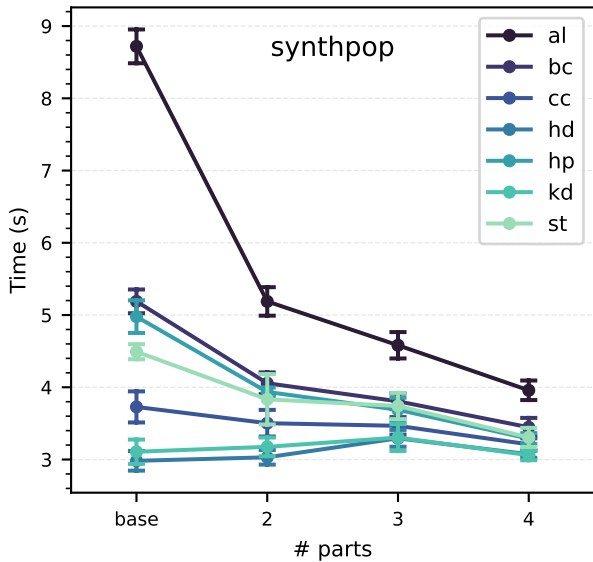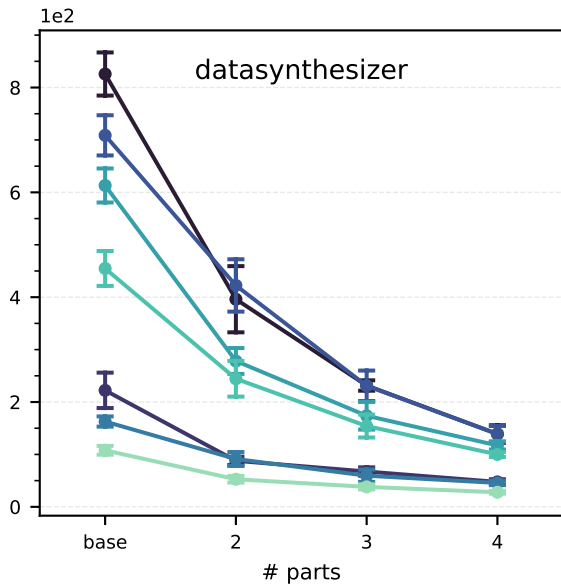

Supplement: supplementary_material [file figure5a_time_vs_partitions.pdf › disjoint-synthetic-data-generation-main/experiments/figures/figure5a_time_vs_partitions.pdf]

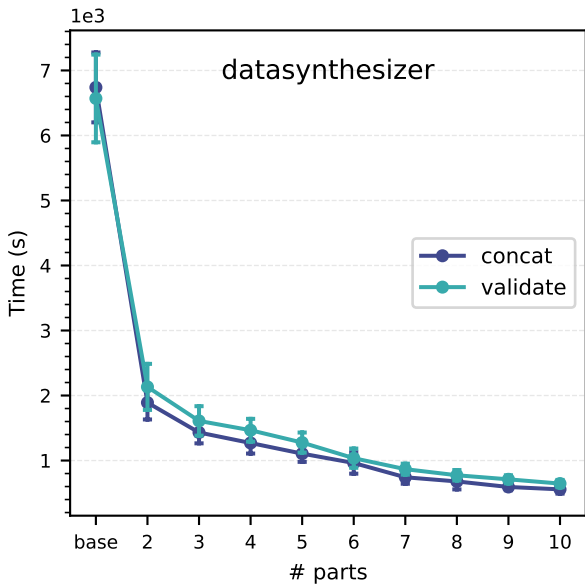

Supplement: supplementary_material [file figure5b_time_vs_partitions.pdf › disjoint-synthetic-data-generation-main/experiments/figures/figure5b_time_vs_partitions.pdf]

Avg. Hellinger dist. ↓

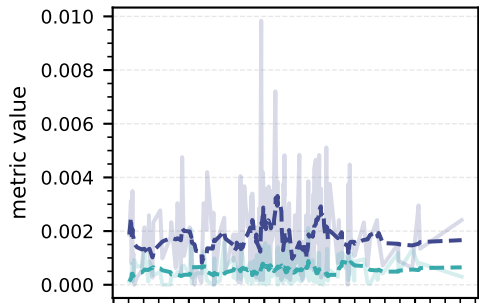

Corr. matrix diff. ↓

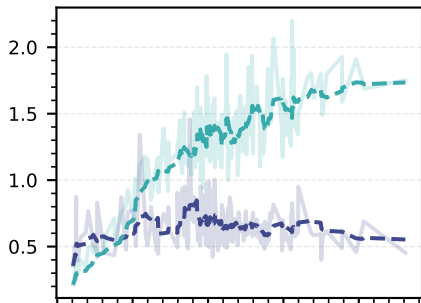

F1 test diff. ↑

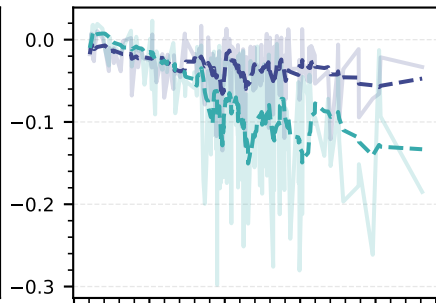

AUROC test diff. ↑

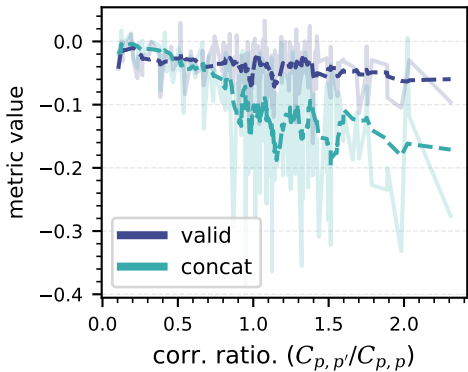 $\epsilon$  ident. risk ↓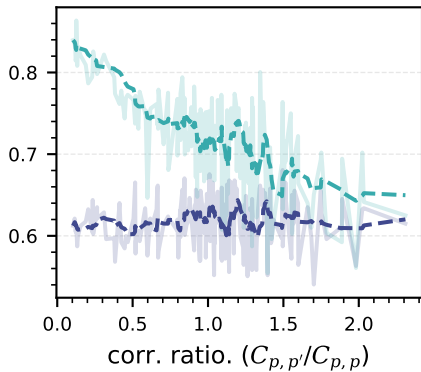

MIA recall ↓

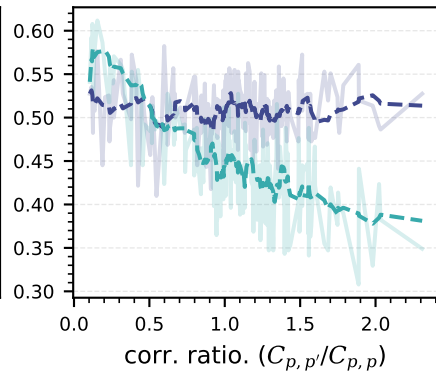

Supplement: supplementary_material [file figure6_correlation_tradeoff_ratio.pdf › disjoint-synthetic-data-generation-main/experiments/figures/figure6_correlation_tradeoff_ratio.pdf]

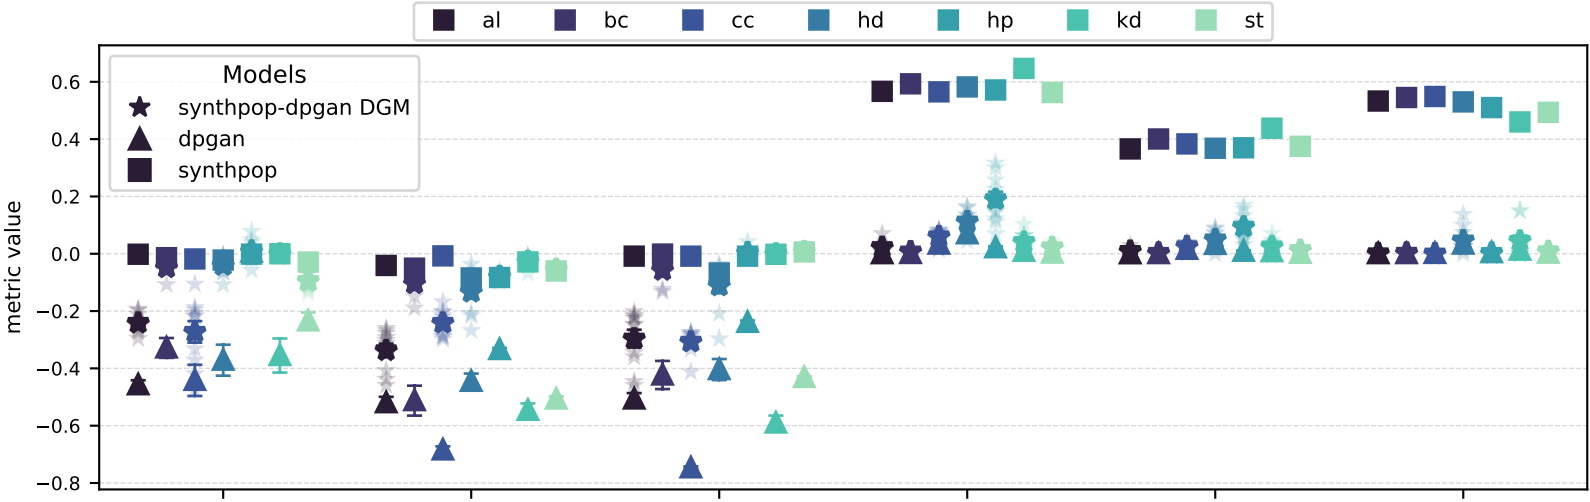

Supplement: supplementary_material [file figure7_synthpop_dpgan_other_datasets.pdf › disjoint-synthetic-data-generation-main/experiments/figures/figure7_synthpop_dpgan_other_datasets.pdf]

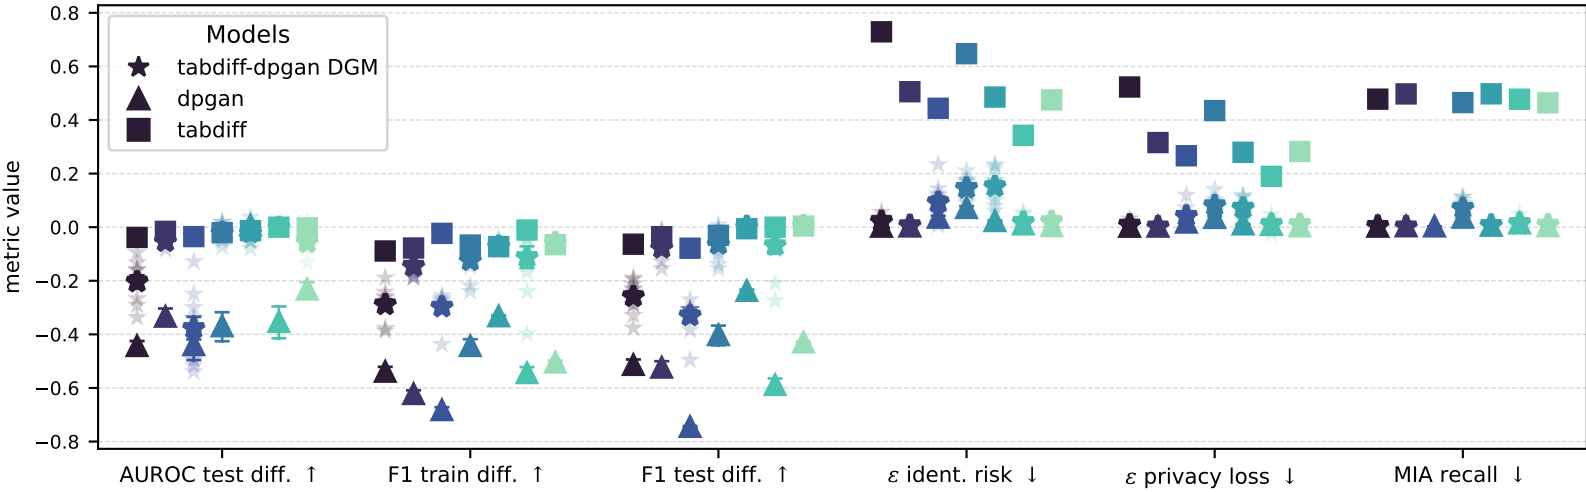

Supplement: supplementary_material [file figure7_tabdiff_dpgan_other_datasets.pdf › disjoint-synthetic-data-generation-main/experiments/figures/figure7_tabdiff_dpgan_other_datasets.pdf]

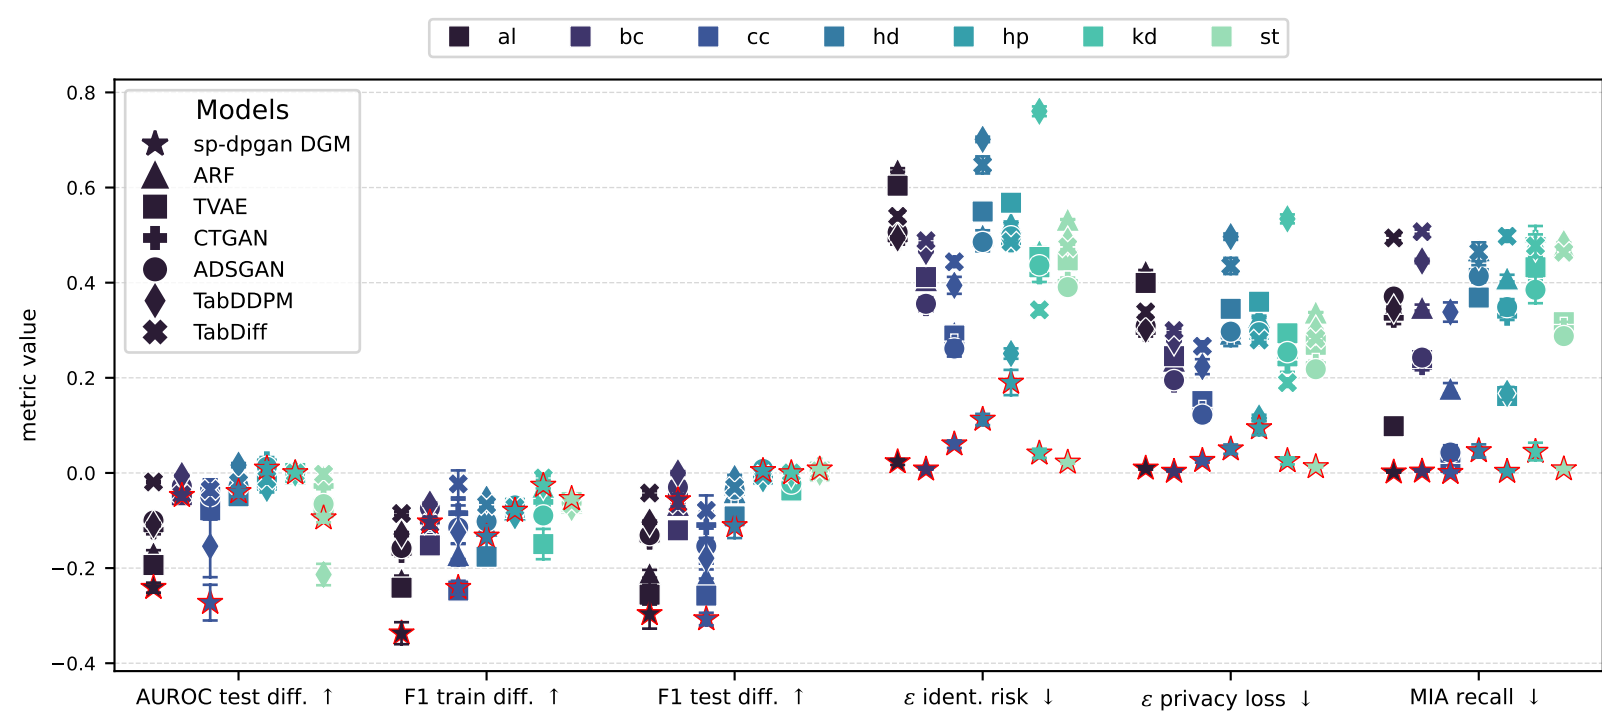

Supplement: supplementary_material [file figure8_other_datasets_baseline.pdf › disjoint-synthetic-data-generation-main/experiments/figures/figure8_other_datasets_baseline.pdf]

| $x_1$ | $x_2$ | $x_3$ | $x_4$ | $x_5$ |
|-------|-------|-------|-------|-------|
| 1     | 1     | 1     | 1     | 1     |
| 5     | 6     | 2     | 5     | 5     |
| 3     | 3     | 3     | 3     | 3     |
| 4     | 4     | 4     | 4     | 4     |
| 6     | 2     | 6     | 2     | 6     |
| 2     | 5     | 5     | 6     | 2     |



| $x_1$ | $x_2$ | $x_3$ | $x_4$ | $x_5$ |
|-------|-------|-------|-------|-------|
|       |       |       | mode  |       |
| mode  |       | mode  |       |       |
|       | mode  |       |       | mode  |
| mode  |       |       | mode  |       |
|       |       |       |       | mode  |
|       | mode  | mode  |       |       |

[illegible]

Supplement: supplementary_material [file figure9_noise_baselines.pdf › disjoint-synthetic-data-generation-main/experiments/figures/figure9_noise_baselines.pdf]
